# Supplementary material for: Preparation and assembly of SiO2@TiO2 photoresponsive colloidal rings
Source: Royal Society of Chemistry journal article supplement (doi:10.1039/d5cc01902h), 2025-01-01
Supplement: d5cc01902h1.pdf [file d5cc01902h1.pdf]

## Electronic Supplementary Information (ESI)

# Preparation and Assembly of SiO<sub>2</sub>@TiO<sub>2</sub> Photoresponsive Colloidal Rings

Xiaoyu Pan,<sup>[a]</sup> Huaguang Wang, \*<sup>[a]</sup> Zexin Zhang\*<sup>[a, b]</sup>

<sup>a</sup> College of Chemistry, Chemical Engineering and Materials Science, Soochow University, Suzhou 215123, China.

<sup>b</sup> Center for Soft Condensed Matter Physics and Interdisciplinary Research, and Institute for Advanced Study, Soochow University, Suzhou 215123, China

\* E-mail: hgwang@suda.edu.cn, zhangzx@suda.edu.cn

## 1. Supporting Videos

Videos were recorded at 5 frames per second using a video camera (Basler ACE) mounted on an inverted optical microscope (Olympus IX73) in bright-field mode. The videos showed the assembly processes in a 0.5% H<sub>2</sub>O<sub>2</sub> solution under UV light irradiation at 15 mW/cm<sup>2</sup>.

**Video S1.** Self-assembly of photoresponsive colloidal rings. The video has dimensions of 25 × 17 μm in length and width. The video is played at 5x speed of real-time.

**Video S2.** Hybrid assembly of photoresponsive colloidal rings with silica microspheres. The video has dimensions of 22 × 12 μm in length and width. The video is played at 5x speed of real-time.

## 2. Supporting Figures

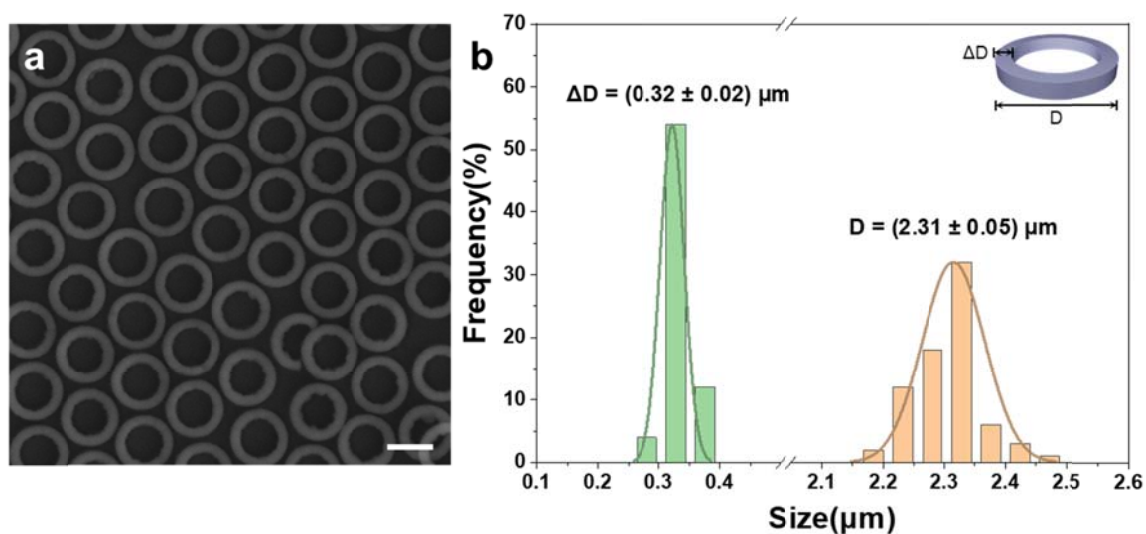

**Fig. S1** (a) SEM image of the  $\text{SiO}_2@\text{TiO}_2$  rings. Scale bar: 2  $\mu\text{m}$ . (b) Size distribution of the rings.

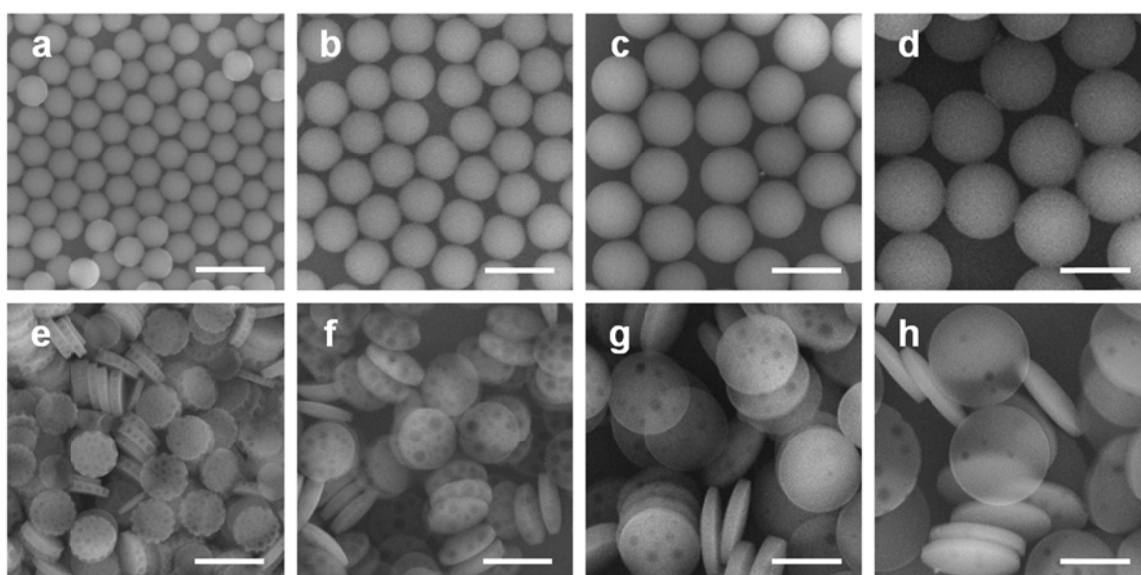

**Fig. S2** (a-d) SEM images of PS seed particles with different diameters: (a)  $0.89 \pm 0.02 \mu\text{m}$ , (b)  $1.28 \pm 0.02 \mu\text{m}$ , (c)  $1.67 \pm 0.04 \mu\text{m}$ , and (d)  $2.17 \pm 0.02 \mu\text{m}$ . (e-h) SEM images of the corresponding PS discs prepared from the PS seed particles in (a-d). Scale bars: 2  $\mu\text{m}$ .

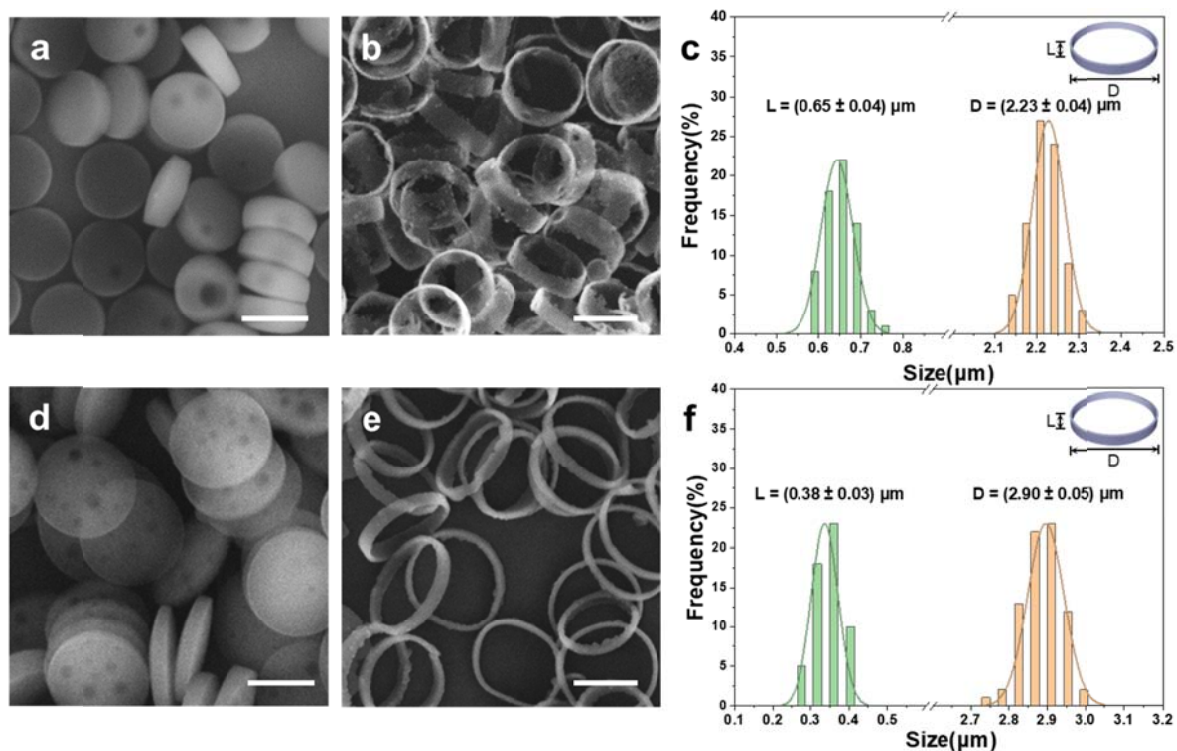

**Fig. S3** (a, d) SEM images of the PS discs synthesized with different amounts of decane: (a) 1.0 g and (d) 5.0 g. (b, e) SEM images of the corresponding SiO<sub>2</sub> rings prepared from the PS discs in (a, d). Scale bars: 2 μm. (c, f) Size distribution of the SiO<sub>2</sub> rings.

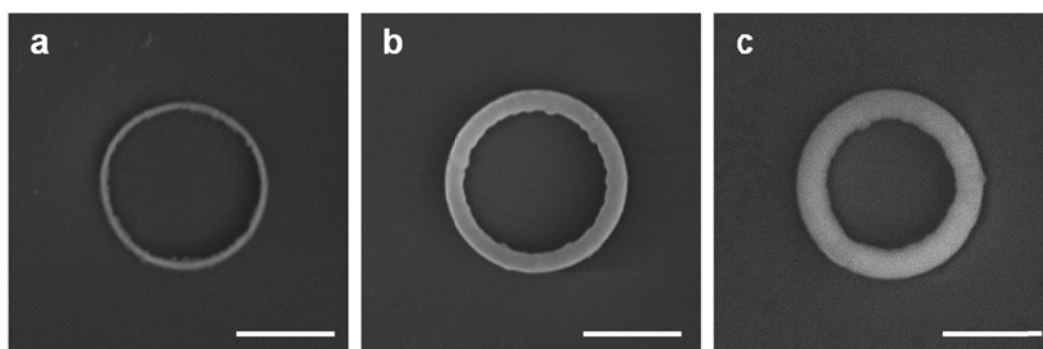

**Fig. S4** (a-c) SEM images of SiO<sub>2</sub> rings with different thicknesses: (a) 0.07 μm, (b) 0.21 μm, and (c) 0.31 μm, which were prepared by repeated cycles of the silica growth. Scale bars: 1 μm.

### 3. Materials and Methods

#### 3.1 Materials

All reagents were analytical grade and used without any further purification. Styrene (St, 99%), 2,2'-azobis(isobutyronitrile) (AIBN, 99%), tetramethylammonium hydroxide (TMAH, 10 wt% aqueous solution), n-butanol, tris(hydroxymethyl)aminomethane (Tris), 2-ethylhexyl methacrylate (EHMA, 99%), decane and hydrogen peroxide ( $\text{H}_2\text{O}_2$ ) were sourced from Shanghai Aladdin Biochemical Technology Co., Ltd. Poly(N-vinylpyrrolidone) (PVP,  $M_w = 40000$ ) was purchased from Shanghai Dikai Biological Technology Co., Ltd. Dopamine hydrochloride (DA, 98%) and ammonium hydroxide (28 wt% aqueous solution) were obtained from Shanghai Macklin Biochemical Co., Ltd. Anhydrous ethanol, anhydrous methanol, tetraethyl orthosilicate (TEOS), and tetrahydrofuran (THF) were obtained from Jiangsu Qiangsheng Chemical Co., Ltd. Tetrabutyl titanate (TBT) was purchased from TCI (Shanghai) Development Co., Ltd. Deionized water with resistivity  $\geq 18.2 \text{ M}\Omega \cdot \text{cm}^{-1}$  was purified using a Milli-Q Ultrapure Water System (Millipore Sigma) and was used in all aqueous solutions in this work.

#### 3.2 Synthesis of polystyrene (PS) microspheres

The PS microspheres were synthesized using a conventional dispersion polymerization method. Briefly, 2.0 g of PVP, 0.3 g of AIBN, and 50.0 g of anhydrous ethanol were added into a 250 mL flask and stirred until fully dissolved. The mixture was bubbled with nitrogen for 10 minutes to remove oxygen, followed by the addition of 5.0 g of St and an additional 10 minutes of nitrogen bubbling. The reaction mixture was then transferred to an oil bath at  $70^\circ\text{C}$  for 4 hours. The resulting PS microspheres were separated by centrifugation and washed repeatedly with ethanol and deionized water. The obtained PS microspheres had an initial diameter of  $0.89 \pm 0.02 \text{ }\mu\text{m}$ . By extending the polymerization time, PS microspheres with diameters of  $1.28 \pm 0.02 \text{ }\mu\text{m}$ ,  $1.67 \pm 0.04 \text{ }\mu\text{m}$ , and  $2.17 \pm 0.02 \text{ }\mu\text{m}$  were sequentially obtained.

#### 3.3 Synthesis of PS discs

1.0 g of synthesized PS microspheres was fully dispersed in a mixture of 32.0 g anhydrous methanol

and 8.0 g deionized water by sonication for 30 minutes. Next 0.4 g of PVP and 0.08 g of AIBN were added to the solution. After complete dissolution, 1.0 g of EHMA and 5.0 g of decane were added, followed by hand shaking for 5 minutes to homogenize the mixture. The reaction was then performed in a water bath at 61°C under horizontal shaking at 120 rpm for 18 hours. The products were collected via centrifugation and repeatedly washed with n-butanol.

### 3.4 Synthesis of SiO<sub>2</sub> rings

SiO<sub>2</sub> rings were prepared via an effective site-selective growth strategy in a previous work<sup>1</sup>. First, the synthesized PS discs were dispersed in a mixture of 80.0 mL anhydrous ethanol and 16.0 mL deionized water. Subsequently, 0.9 mL of ammonia (28.0 wt%) and 1.2 mL of TEOS were added. The reaction was carried out with magnetic stirring at 300 rpm for 4 hours. The resulting particles were repeatedly cleaned by centrifugation with ethanol. After removing the PS templates with THF, a good solvent for PS, SiO<sub>2</sub> rings were successfully obtained. To increase the thickness of the SiO<sub>2</sub> rings, a secondary SiO<sub>2</sub> layer was grown. The above SiO<sub>2</sub> rings were redispersed in 80.0 mL anhydrous ethanol and 16.0 mL deionized water, and then 140 µL of 10 wt% TMAH and 2.0 mL of TEOS were added. This growth step was repeated until the desired  $\Delta D$  was achieved. In our experiment, the SiO<sub>2</sub> rings with  $\Delta D$  values of 0.07 µm, 0.21 µm, and 0.31 µm were obtained after 1, 3, and 5 growth cycles, respectively.

### 3.5 Synthesis of SiO<sub>2</sub>@TiO<sub>2</sub> rings

First, a Tris-HCl solution (pH 8.5) was prepared by adding 50.0 mL of 0.1 mol/L Tris solution and 14.7 mL of 0.1 mol/L HCl solution to a 100 mL volumetric flask, followed by dilution with deionized water. For the synthesis of the SiO<sub>2</sub>@PDA rings, the obtained SiO<sub>2</sub> rings and 30.0 mg dopamine hydrochloride were dispersed in 40.0 mL Tris-HCl solution. The mixture was stirred for 4 hours and then washed repeatedly with ethanol via centrifugation.

The obtained SiO<sub>2</sub>@PDA rings were magnetically stirred in 20.0 mL of anhydrous ethanol. Subsequently, 200 µL of TBT and 80 µL of deionized water were added, and the mixture reacted for

4 hours. The resulting products were washed with ethanol several times and dried. Finally, the SiO<sub>2</sub>@TiO<sub>2</sub> photoresponsive colloidal rings were obtained after annealing at 500°C for 2 hours.

### 3.6 Characterizations

Scanning electron microscopy (SEM) images were taken using a field emission scanning electron microscope (SU8010, Hitachi) with an operating voltage of 15 kV and an operating current of 30 pA. Transmission electron microscopy (TEM) images, high-angle annular dark-field scanning transmission electron microscopy (HAADF-STEM) images, and selected-area electron diffraction (SAED) patterns were obtained with a transmission electron microscope (FEI Tecnai G2 F20) with an operating voltage of 200 kV. X-ray powder diffraction (XRD) patterns were characterized by an X-ray powder diffractometer (X'pert Pro MPD, Cu K $\alpha$  radiation source,  $\lambda = 0.15406$  nm).

### 3.7 Optical Video Microscopy

A sample cell was prepared by affixing a polystyrene cylindrical tube (approximately 1 cm in height and diameter) to a glass slide using UV-curable adhesive. The sample cells were first blow-dried with nitrogen, and then treated with plasma cleaner before use to enhance hydrophilicity and prevent colloidal particles adhesion to the substrate. The assembly of photoresponsive colloidal rings was observed and recorded at 5 frames per second using a Basler ACE camera mounted on an inverted optical microscope (Olympus IX73). For microscopy samples, an aqueous suspension of SiO<sub>2</sub>@TiO<sub>2</sub> rings was mixed with 0.5% (v/v) H<sub>2</sub>O<sub>2</sub> solution (pH 8.0, adjusted with TMAH) and introduced into the sample cell. After the colloidal particles were deposited at the bottom of the cell, UV light was applied.

### 3.8 Numerical simulation of H<sub>2</sub>O<sub>2</sub> concentration

Numerical simulations were performed using the COMSOL Multiphysics package (version 5.2) in a two-dimensional axisymmetric configuration. Briefly, a photoresponsive colloidal ring was placed at the center of a 100  $\mu\text{m} \times 100 \mu\text{m}$  square space filled with H<sub>2</sub>O<sub>2</sub> solution. The inner and outer diameters of the colloidal ring are 1.67  $\mu\text{m}$  and 2.31  $\mu\text{m}$ , respectively. The bulk H<sub>2</sub>O<sub>2</sub> concentration

( $C_{\text{H}_2\text{O}_2}$ ) was set to  $0.147 \text{ mol/m}^3$ , and the diffusion constant of  $\text{H}_2\text{O}_2$  in water was  $6.6 \times 10^{-10} \text{ m}^2/\text{s}$ . The flux ( $J_{\text{H}_2\text{O}_2}$ ) of hydrogen peroxide molecules from the UV-illuminated  $\text{TiO}_2$  surface was set to  $-1 \text{ mmol}\cdot\text{m}^2/\text{s}$ , simulating  $\text{H}_2\text{O}_2$  decomposition. This simulation revealed  $\text{H}_2\text{O}_2$  concentration gradients around the ring, both internally and externally. Notably, varying  $C_{\text{H}_2\text{O}_2}$  and  $J_{\text{H}_2\text{O}_2}$  values yielded similar results. Such an approach has been widely used to study the concentration gradients around photocatalytic particles<sup>2, 3</sup>.

## References

1. Y. Wu, Z. Luo, B. Liu and Z. Yang, *Angewandte Chemie International Edition*, 2017, **56**, 9807-9811.
2. C. Chen, F. Mou, L. Xu, S. Wang, J. Guan, Z. Feng, Q. Wang, L. Kong, W. Li, J. Wang and Q. Zhang, *Advanced Materials*, 2016, **29**, 1603374.
3. D. P. Singh, U. Choudhury, P. Fischer and A. G. Mark, *Advanced Materials*, 2017, **29**, 1701328.
